# Supplementary material
Source: PubMed Central journal article supplement (PMC7413641)
Supplement: NIHMS1612954-supplement-Supplemental_1.pdf [file NIHMS1612954-supplement-Supplemental_1.pdf]

**Title:** Molecularly Engineered Nanobodies for Tunable Pharmacokinetics and Drug Delivery

**Authors:** Patrick M. Glassman<sup>†</sup>, Landis R. Walsh<sup>†</sup>, Carlos H. Villa<sup>†</sup>, Oscar A. Marcos-Contreras<sup>†</sup>, Elizabeth D. Hood<sup>†</sup>, Vladimir R. Muzykantov<sup>†</sup>,  
Colin F. Greineder<sup>†,‡,\*</sup>

**Author Affiliations:**

<sup>†</sup>Department of Systems Pharmacology and Translational Therapeutics, Perelman School of Medicine, University of Pennsylvania, Philadelphia, Pennsylvania 19104, United States

<sup>‡</sup>Department of Emergency Medicine and Department of Pharmacology, University of Michigan, Ann Arbor, Michigan 48109, United States

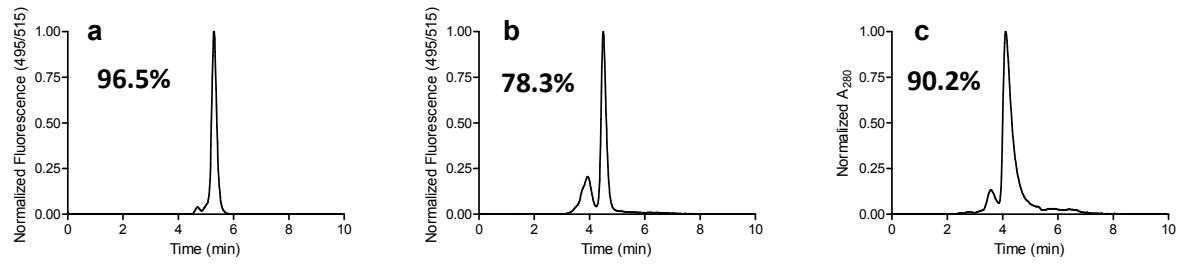

**Figure S1:** Size exclusion HPLC trace for fluorescently labeled (a) VCAMElid, (b) BiVCAMElid, and (c) VCAM/ALB8. Values represent % monomer content. All proteins were purified to >90% purity prior to further use.

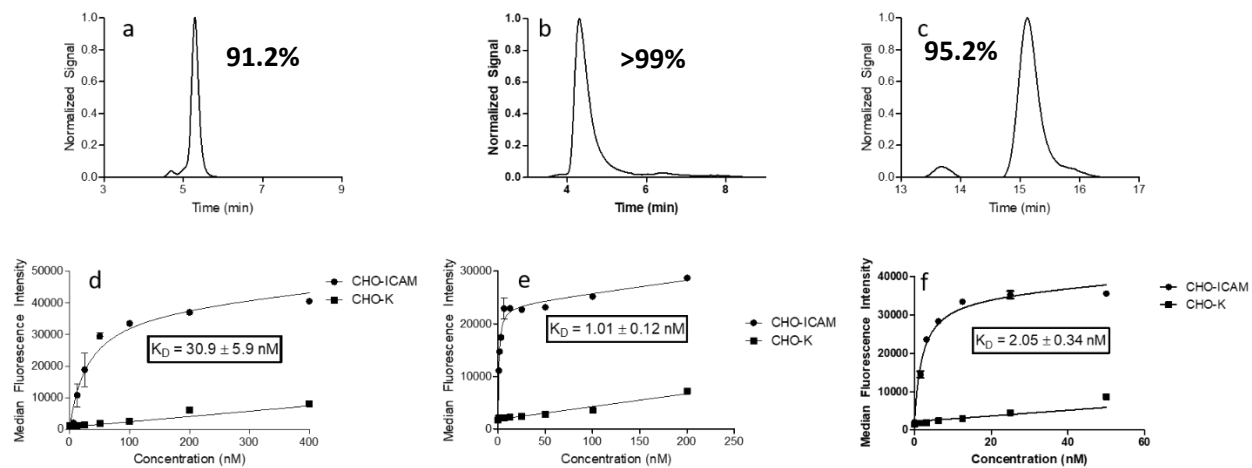

**Figure S2:** In vitro characterization of untargeted control nanobody and engineered variants. Size exclusion HPLC trace for (a) monovalent, (b) bivalent, and (c) albumin-binding control nanobodies. Binding of control nanobodies to cells transfected to express human intercellular adhesion molecule-1: (d) monovalent, (e) bivalent, (f) albumin-binding.

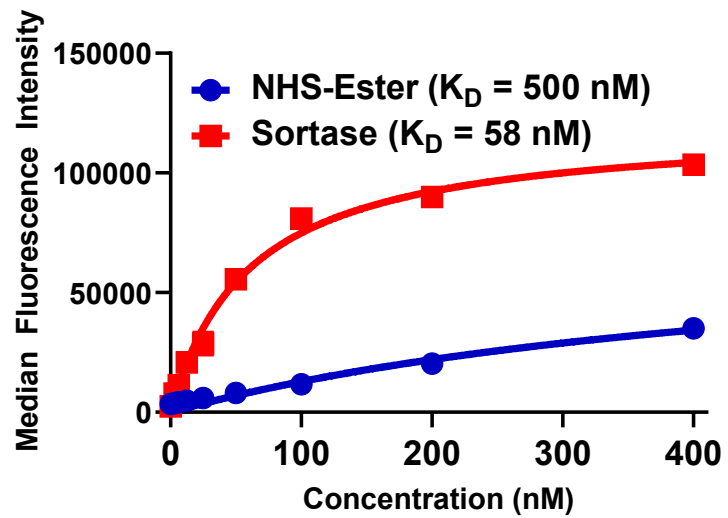

**Figure S3:** Comparative binding of VCAMelid to mVCAM-1 following labeling at the C-terminus and on free amines.

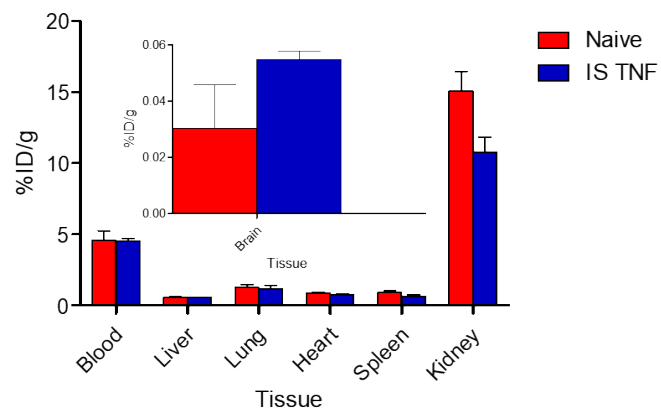

**Figure S4:** In vivo behavior of  $^{125}\text{I}$ -labeled SOD-azide in naïve and TNF- $\alpha$ -injured mice. (a) Whole body biodistribution of SOD and (b) brain uptake of SOD.

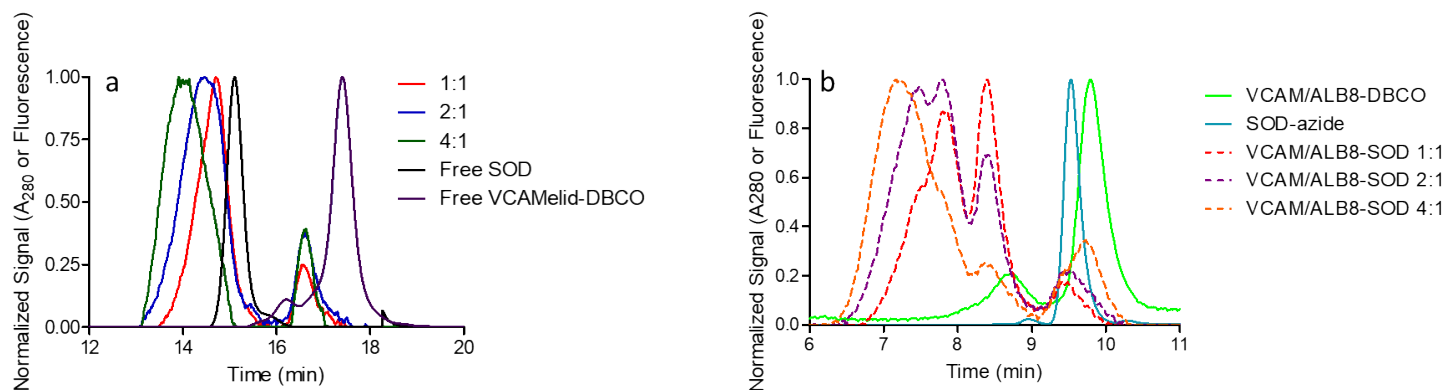

**Figure S5:** Size exclusion HPLC trace for (a) VCAMelid-SOD conjugates at a variety of reaction ratios and (b) VCAM/ALB8-SOD conjugates. The fraction of VCAMelid conjugated to SOD was 86.3% (1:1), 86.6% (2:1), and 88.0% (4:1). The fraction of VCAM/ALB8 conjugated to SOD was 90.9% (1:1), 89.8% (2:1), and 84.0% (4:1).

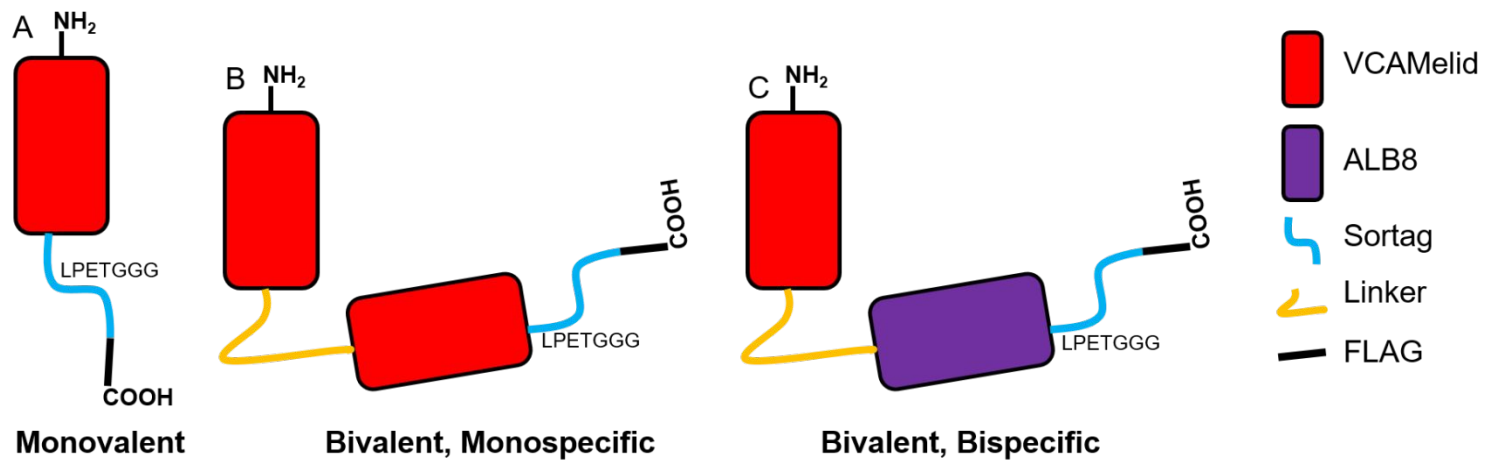

**Figure S6:** Nanobody constructs used in this study. A: Monovalent, B: Bivalent, C: Bispecific

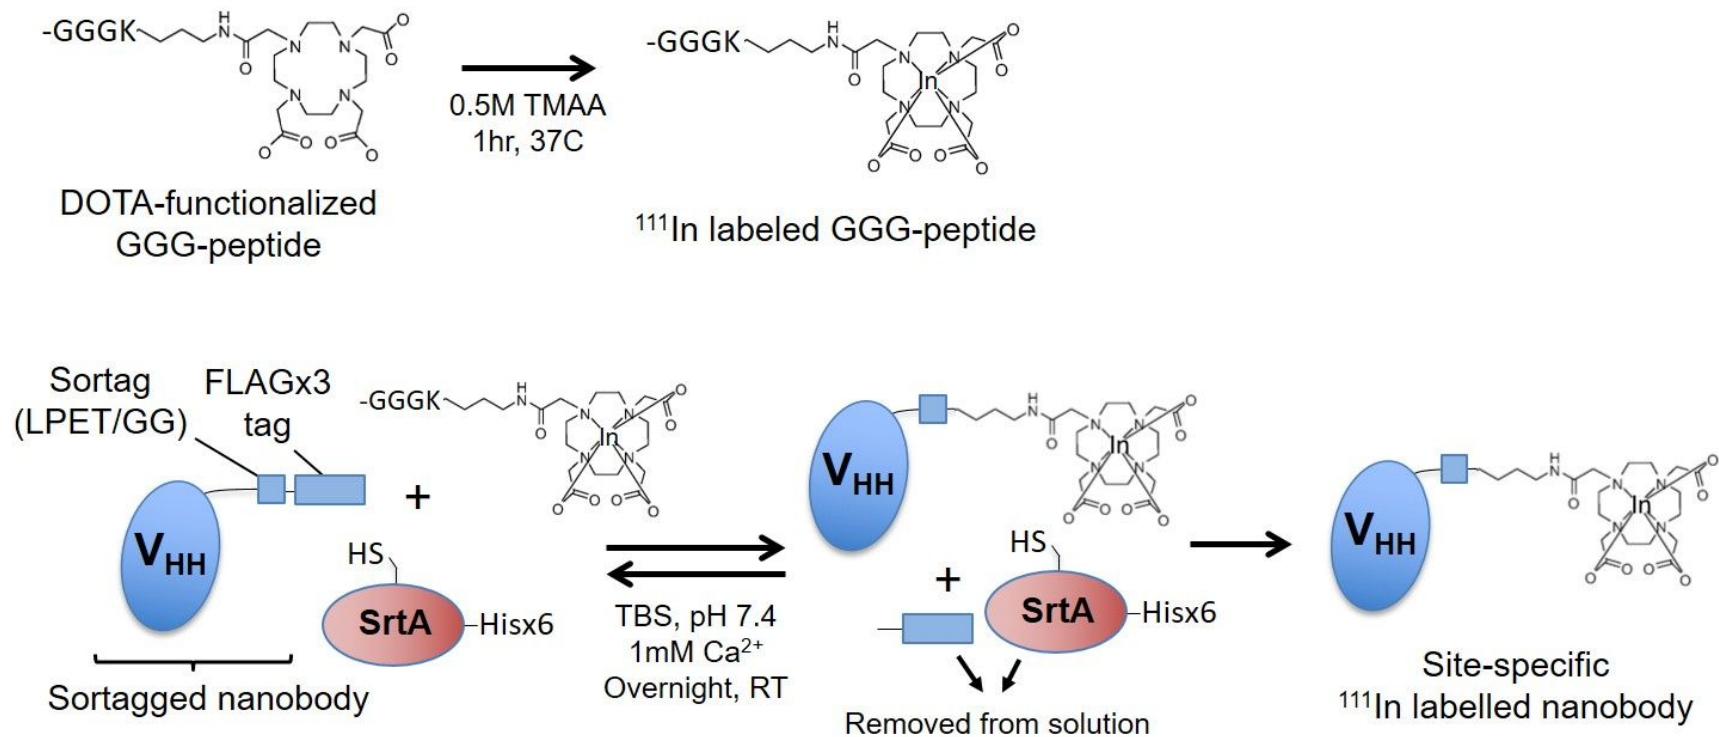

**Figure S7:** Reaction scheme for Sortase A-based radiolabeling of nanobodies (Nb). DOTA-functionalized GGG-peptide was labeled with  $^{111}\text{In}$  by incubation in metal-free, 0.5M TMAA, pH 4.5, for 1 hour at 37°C. Nb (40  $\mu\text{M}$ ), Sortase A (40  $\mu\text{M}$ ), and radiolabeled peptide (100  $\mu\text{M}$ ) were incubated in Tris-buffered saline (TBS), pH 7.4, containing 1 mM  $\text{CaCl}_2$  overnight at room temperature. Post-reaction, Sortase A was removed from solution using Ni-NTA agarose beads and unreacted peptide was removed via desalting.



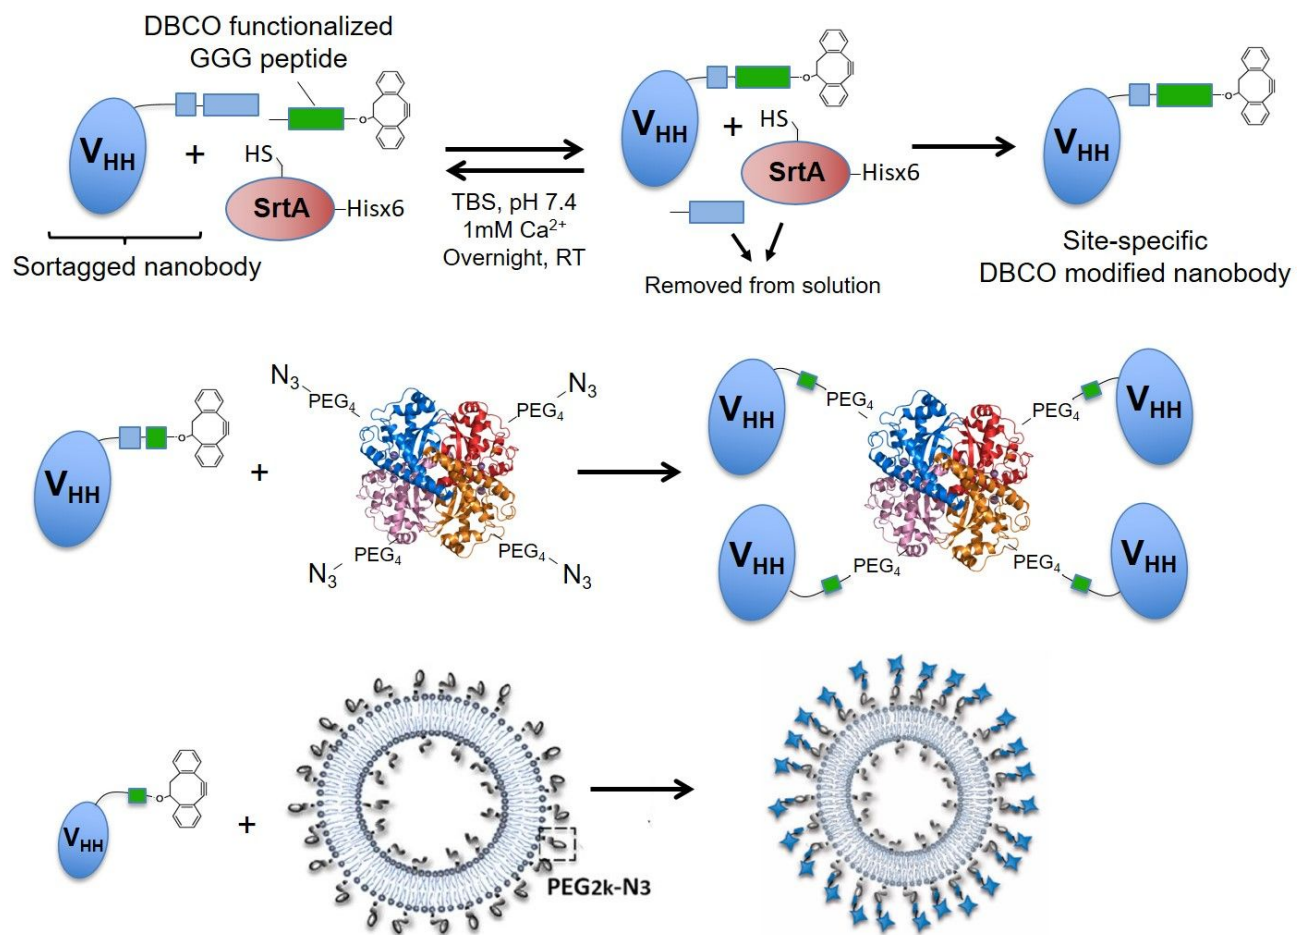

**Figure S8:** Reaction scheme for conjugation of nanobody (Nb). Upper panel: Nb are functionalized with DBCO using Sortase A (SrtA)-mediated transpeptidation. Middle panel: Conjugation of DBCO-modified Nb to azide-modified SOD-1 using strain-promoted alkyne-azide cycloaddition (SPAAC). Lower panel: Conjugation of DBCO-modified Nb to azide-containing liposomes using SPAAC.

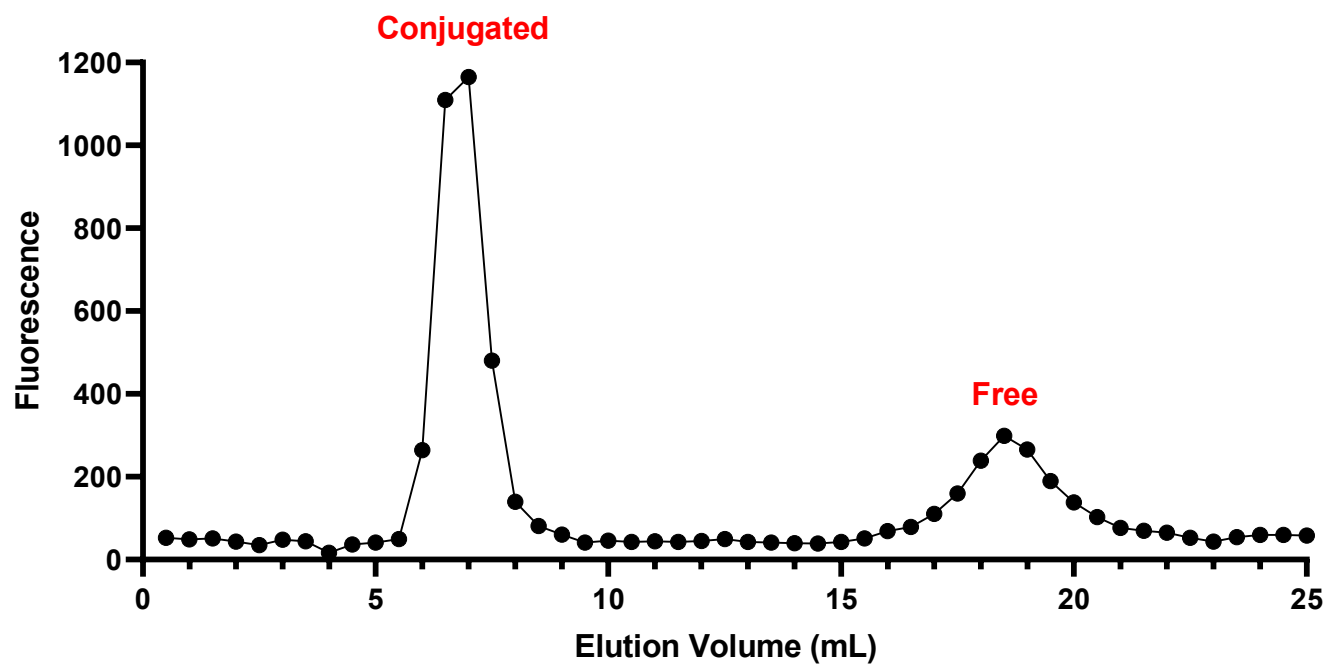

Figure S9: Efficiency of conjugation of VCAMelid-DBCO to azide liposomes. Fluorescence was monitored at each 0.5 mL elution fraction collected from the Sepharaose CL-4B column. From AUC analysis of the elution profile, 65.6% of added nanobodies were conjugated to the liposomes.

**Table S1:** Tissue pharmacokinetics of VCAMelid, BiVCAMelid, and VCAM/ALB8. Values are displayed as mean (SEM).

| <b>Tissue</b> | <b>Molecule</b> | <b>20 minutes</b> | <b>2 hours</b> | <b>6 hours</b> | <b>24 hours</b> |
|---------------|-----------------|-------------------|----------------|----------------|-----------------|
| <b>Blood</b>  | VCAMelid        | 2.26 (0.11)       | 1.06 (0.07)    | 0.139 (0.019)  |                 |
|               | BiVCAMelid      | 4.98 (0.42)       | 3.24 (0.20)    | 0.614 (0.039)  |                 |
|               | VCAM/ALB8       | 32.9 (0.5)        | 22.5 (1.5)     | 14.5 (1.0)     | 5.15 (0.15)     |
| <b>Lung</b>   | VCAMelid        | 2.79 (0.20)       | 2.92 (0.28)    | 1.38 (0.14)    |                 |
|               | BiVCAMelid      | 3.80 (0.34)       | 4.56 (2.47)    | 2.34 (0.10)    |                 |
|               | VCAM/ALB8       | 6.21 (0.59)       | 5.54 (0.13)    | 7.10 (0.59)    | 6.26 (0.40)     |
| <b>Liver</b>  | VCAMelid        | 2.29 (0.22)       | 2.56 (0.69)    | 1.46 (0.12)    |                 |
|               | BiVCAMelid      | 4.88 (0.69)       | 2.73 (0.60)    | 3.34 (0.36)    |                 |
|               | VCAM/ALB8       | 13.9 (1.6)        | 12.5 (1.8)     | 18.2 (1.6)     | 12.5 (1.1)      |
| <b>Heart</b>  | VCAMelid        | 1.50 (0.08)       | 0.818 (0.196)  | 0.308 (0.115)  |                 |
|               | BiVCAMelid      | 2.95 (0.34)       | 0.839 (0.111)  | 0.847 (0.152)  |                 |
|               | VCAM/ALB8       | 4.19 (0.08)       | 3.88 (0.02)    | 4.54 (0.54)    | 2.74 (0.03)     |
| <b>Kidney</b> | VCAMelid        | 155 (12)          | 214 (13)       | 195 (53)       |                 |
|               | BiVCAMelid      | 163 (24)          | 206 (14)       | 260 (19)       |                 |
|               | VCAM/ALB8       | 32.5 (0.8)        | 34.8 (1.8)     | 48.4 (10.0)    | 41.9 (2.4)      |
| <b>Spleen</b> | VCAMelid        | 25.0 (0.9)        | 15.4 (1.7)     | 12.2 (1.7)     |                 |
|               | BiVCAMelid      | 48.0 (5.5)        | 16.5 (1.0)     | 17.5 (4.4)     |                 |
|               | VCAM/ALB8       | 90.5 (8.6)        | 101 (2)        | 79.4 (8.1)     | 115 (6)         |
| <b>Brain</b>  | VCAMelid        | 0.781 (0.106)     | 0.467 (0.116)  | 0.260 (0.056)  |                 |
|               | BiVCAMelid      | 1.56 (0.22)       | 0.595 (0.248)  | 0.168 (0.062)  |                 |
|               | VCAM/ALB8       | 2.90 (0.18)       | 2.06 (0.16)    | 1.62 (0.15)    | 1.43 (0.14)     |

**Table S2:** Whole-body biodistribution of VCAMelid-SOD and VCAM/ALB8-SOD. Values are displayed as mean (SEM).

| <b>Tissue</b>        | <b>Condition</b> | <b>SOD</b>    | <b>Control-SOD</b> | <b>VCAMelid-SOD</b> | <b>Control/ALB8-SOD</b> | <b>VCAM/ALB8-SOD</b> |
|----------------------|------------------|---------------|--------------------|---------------------|-------------------------|----------------------|
| <b>Blood</b>         | Naïve            | 4.61 (0.63)   | 7.57 (0.30)        | 4.12 (0.13)         | 38.1 (1.3)              | 31.4 (2.9)           |
|                      | Injured          | 4.54 (0.17)   | 12.2 (0.3)         | 4.36 (0.14)         | 44.3 (1.4)              | 24.3 (0.9)           |
| <b>Lung</b>          | Naïve            | 1.28 (0.16)   | 2.60 (0.67)        | 2.82 (0.06)         | 3.77 (1.14)             | 4.40 (1.08)          |
|                      | Injured          | 1.19 (0.23)   | 1.94 (0.46)        | 2.79 (0.30)         | 5.41 (3.80)             | 6.53 (0.45)          |
| <b>Liver</b>         | Naïve            | 0.586 (0.040) | 19.1 (0.8)         | 17.8 (0.6)          | 7.81 (0.27)             | 6.30 (0.38)          |
|                      | Injured          | 0.565 (0.033) | 21.7 (1.1)         | 14.8 (0.9)          | 10.2 (0.1)              | 11.3 (0.8)           |
| <b>Heart</b>         | Naïve            | 0.895 (0.054) | 1.44 (0.16)        | 1.41 (0.11)         | 2.11 (0.25)             | 2.31 (0.30)          |
|                      | Injured          | 0.764 (0.070) | 1.42 (0.05)        | 1.55 (0.07)         | 1.50 (0.14)             | 1.98 (0.07)          |
| <b>Kidney</b>        | Naïve            | 15.1 (1.4)    | 34.1 (1.6)         | 27.3 (0.8)          | 3.56 (0.30)             | 8.98 (0.84)          |
|                      | Injured          | 10.8 (1.1)    | 35.8 (3.3)         | 24.1 (1.2)          | 6.63 (0.56)             | 8.89 (0.29)          |
| <b>Spleen</b>        | Naïve            | 0.919 (0.136) | 11.4 (0.5)         | 31.1 (2.1)          | 5.00 (0.46)             | 40.3 (2.2)           |
|                      | Injured          | 0.660 (0.088) | 10.5 (0.5)         | 28.1 (1.5)          | 7.75 (0.04)             | 44.1 (2.5)           |
| <b>Brain</b>         | Naïve            | 0.030 (0.016) | 0.071 (0.004)      | 0.328 (0.029)       | 0.126 (0.024)           | 0.341 (0.005)        |
|                      | Injured          | 0.055 (0.003) | 0.102 (0.005)      | 1.28 (0.10)         | 0.166 (0.001)           | 1.90 (0.07)          |
| <b>Thyroid (%ID)</b> | Naïve            | 0.422 (0.009) | 2.94 (0.29)        | 2.29 (0.25)         | 0.255 (0.037)           | 0.178 (0.016)        |
|                      | Injured          | 0.348 (0.039) | 2.73 (0.71)        | 2.44 (0.35)         | 0.135 (0.041)           | 0.226 (0.040)        |

**Table S3:** Whole-body biodistribution of VCAMElid and VCAM/ALB8-targeted liposomes. Values are displayed as mean (SEM).

| <b>Tissue</b> | <b>Condition</b> | <b>Untargeted</b> | <b>VCAM</b>   | <b>VCAM/ALB8</b> |
|---------------|------------------|-------------------|---------------|------------------|
| <b>Blood</b>  | Naïve            | 27.7 (0.9)        | 15.8 (5.6)    | 19.8 (2.6)       |
|               | Injured          | 17.7 (3.4)        | 15.7 (5.2)    | 19.2 (3.2)       |
| <b>Lung</b>   | Naïve            | 12.1 (1.1)        | 3.27 (0.30)   | 13.0 (2.1)       |
|               | Injured          | 10.5 (1.2)        | 4.24 (1.29)   | 16.7 (1.3)       |
| <b>Liver</b>  | Naïve            | 25.4 (2.6)        | 17.6 (3.1)    | 13.3 (2.7)       |
|               | Injured          | 31.5 (3.0)        | 30.3 (8.0)    | 26.3 (1.0)       |
| <b>Heart</b>  | Naïve            | 1.50 (0.15)       | 0.678 (0.196) | 0.996 (0.138)    |
|               | Injured          | 1.15 (0.32)       | 1.19 (0.34)   | 1.52 (0.20)      |
| <b>Kidney</b> | Naïve            | 3.45 (0.30)       | 1.86 (0.48)   | 2.57 (0.33)      |
|               | Injured          | 2.39 (0.15)       | 3.05 (0.89)   | 4.14 (0.39)      |
| <b>Spleen</b> | Naïve            | 94.3 (13.9)       | 104 (16)      | 109 (17)         |
|               | Injured          | 63.3 (2.9)        | 141 (34)      | 108 (9)          |
| <b>Brain</b>  | Naïve            | 0.264 (0.007)     | 0.132 (0.011) | 0.278 (0.026)    |
|               | Injured          | 0.427 (0.035)     | 1.04 (0.25)   | 1.12 (0.23)      |

**Table S4:** Tissue-to-blood ratios and immunospecificity indexes of VCAMelid.

| <b>Tissue</b> | <b>Condition</b> | <b>Tissue/Blood Untargeted</b> | <b>Tissue/Blood VCAMelid</b> | <b>Immunospecificity Index</b> |
|---------------|------------------|--------------------------------|------------------------------|--------------------------------|
| <b>Lung</b>   | Naïve            | 0.897 (0.100)                  | 1.13 (0.12)                  | 1.26 (0.13)                    |
|               | IV LPS           | 1.01 (0.21)                    | 1.35 (0.04)                  | 1.34 (0.04)                    |
|               | IS TNF- $\alpha$ | 2.61 (0.53)                    | 1.23 (0.09)                  | 0.472 (0.034)                  |
| <b>Liver</b>  | Naïve            | 0.550 (0.041)                  | 0.422 (0.019)                | 0.767 (0.035)                  |
|               | IV LPS           | 0.568 (0.109)                  | 1.88 (0.12)                  | 3.31 (0.21)                    |
|               | IS TNF- $\alpha$ | 1.12 (0.13)                    | 1.01 (0.10)                  | 0.906 (0.089)                  |
| <b>Heart</b>  | Naïve            | 0.262 (0.039)                  | 0.540 (0.042)                | 2.06 (0.16)                    |
|               | IV LPS           | 0.511 (0.059)                  | 0.882 (0.044)                | 1.73 (0.09)                    |
|               | IS TNF- $\alpha$ | 0.801 (0.274)                  | 0.663 (0.035)                | 0.828 (0.044)                  |
| <b>Kidney</b> | Naïve            | 37.4 (1.2)                     | 67.7 (1.2)                   | 1.81 (0.03)                    |
|               | IV LPS           | 16.6 (1.2)                     | 24.0 (1.0)                   | 1.44 (0.06)                    |
|               | IS TNF- $\alpha$ | 74.8 (14.7)                    | 68.4 (5.2)                   | 0.915 (0.069)                  |
| <b>Spleen</b> | Naïve            | 0.738 (0.078)                  | 10.3 (0.6)                   | 13.9 (0.8)                     |
|               | IV LPS           | 0.514 (0.135)                  | 4.25 (0.20)                  | 8.27 (0.38)                    |
|               | IS TNF- $\alpha$ | 1.27 (0.05)                    | 11.0 (0.4)                   | 8.69 (0.33)                    |
| <b>Brain</b>  | Naïve            | 0.018 (0.006)                  | 0.071 (0.004)                | 3.93 (0.22)                    |
|               | IV LPS           | N.M.                           | N.M.                         | N.M.                           |
|               | IS TNF- $\alpha$ | 0.066 (0.004)                  | 0.345 (0.047)                | 5.20 (0.71)                    |

**Table S5:** Tissue-to-blood ratios and immunospecificity indexes of BiVCAMelid.

| <b>Tissue</b> | <b>Condition</b> | <b>Tissue/Blood Untargeted</b> | <b>Tissue/Blood BiVCAMelid</b> | <b>Immunospecificity Index</b> |
|---------------|------------------|--------------------------------|--------------------------------|--------------------------------|
| <b>Lung</b>   | Naïve            | 0.572 (0.065)                  | 1.10 (0.15)                    | 1.93 (0.27)                    |
|               | IS TNF- $\alpha$ | 0.438 (0.052)                  | 0.762 (0.068)                  | 1.74 (0.16)                    |
| <b>Liver</b>  | Naïve            | 0.180 (0.022)                  | 1.02 (0.15)                    | 5.64 (0.85)                    |
|               | IS TNF- $\alpha$ | 0.303 (0.021)                  | 0.980 (0.139)                  | 3.23 (0.46)                    |
| <b>Heart</b>  | Naïve            | 0.329 (0.028)                  | 0.631 (0.071)                  | 1.92 (0.22)                    |
|               | IS TNF- $\alpha$ | 0.322 (0.014)                  | 0.592 (0.068)                  | 1.84 (0.21)                    |
| <b>Kidney</b> | Naïve            | 53.3 (2.5)                     | 27.9 (1.1)                     | 0.524 (0.020)                  |
|               | IS TNF- $\alpha$ | 59.9 (8.5)                     | 32.7 (4.8)                     | 0.546 (0.081)                  |
| <b>Spleen</b> | Naïve            | 0.537 (0.021)                  | 13.3 (0.6)                     | 24.7 (1.2)                     |
|               | IS TNF- $\alpha$ | 0.605 (0.088)                  | 9.65 (1.11)                    | 15.9 (1.8)                     |
| <b>Brain</b>  | Naïve            | 0.058 (0.005)                  | 0.116 (0.008)                  | 2.02 (0.14)                    |
|               | IS TNF- $\alpha$ | 0.083 (0.008)                  | 0.313 (0.045)                  | 3.76 (0.54)                    |

**Table S6:** Tissue-to-blood ratios and immunospecificity indexes of VCAM/ALB8.

| <b>Tissue</b> | <b>Condition</b> | <b>Tissue/Blood Untargeted</b> | <b>Tissue/Blood VCAM/ALB8</b> | <b>Immunospecificity Index</b> |
|---------------|------------------|--------------------------------|-------------------------------|--------------------------------|
| <b>Lung</b>   | Naïve            | 0.052 (0.009)                  | 0.114 (0.025)                 | 2.19 (0.48)                    |
|               | IS TNF- $\alpha$ | 0.052 (0.011)                  | 0.189 (0.018)                 | 3.64 (0.34)                    |
| <b>Liver</b>  | Naïve            | 0.028 (0.004)                  | 0.179 (0.012)                 | 6.31 (0.42)                    |
|               | IS TNF- $\alpha$ | 0.063 (0.016)                  | 0.424 (0.048)                 | 6.70 (0.76)                    |
| <b>Heart</b>  | Naïve            | 0.070 (0.008)                  | 0.105 (0.002)                 | 1.49 (0.03)                    |
|               | IS TNF- $\alpha$ | 0.038 (0.003)                  | 0.127 (0.002)                 | 3.34 (0.06)                    |
| <b>Kidney</b> | Naïve            | 0.558 (0.044)                  | 0.619 (0.079)                 | 1.11 (0.14)                    |
|               | IS TNF- $\alpha$ | 0.499 (0.030)                  | 0.989 (0.024)                 | 1.98 (0.05)                    |
| <b>Spleen</b> | Naïve            | 0.093 (0.011)                  | 2.36 (0.127)                  | 25.4 (1.4)                     |
|               | IS TNF- $\alpha$ | 0.130 (0.011)                  | 2.76 (0.261)                  | 21.1 (2.0)                     |
| <b>Brain</b>  | Naïve            | 0.005 (0.001)                  | 0.016 (0.001)                 | 1.78 (0.12)                    |
|               | IS TNF- $\alpha$ | 0.004 (0.001)                  | 0.088 (0.005)                 | 5.27 (0.75)                    |



**Table S7:** Tissue-to-blood ratios and immunospecificity indexes of VCAMelid-SOD conjugates.

| <b>Tissue</b> | <b>Condition</b> | <b>Tissue/Blood Untargeted</b> | <b>Tissue/Blood VCAMelid-SOD</b> | <b>Immunospecificity Index</b> |
|---------------|------------------|--------------------------------|----------------------------------|--------------------------------|
| <b>Lung</b>   | Naïve            | 0.343 (0.088)                  | 0.685 (0.015)                    | 2.00 (0.04)                    |
|               | IS TNF- $\alpha$ | 0.159 (0.038)                  | 0.640 (0.068)                    | 4.01 (0.43)                    |
| <b>Liver</b>  | Naïve            | 2.53 (0.11)                    | 4.31 (0.14)                      | 1.71 (0.05)                    |
|               | IS TNF- $\alpha$ | 1.78 (0.09)                    | 3.39 (0.20)                      | 1.90 (0.11)                    |
| <b>Heart</b>  | Naïve            | 0.190 (0.021)                  | 0.342 (0.027)                    | 1.80 (0.14)                    |
|               | IS TNF- $\alpha$ | 0.117 (0.004)                  | 0.355 (0.016)                    | 3.04 (0.14)                    |
| <b>Kidney</b> | Naïve            | 4.50 (0.22)                    | 6.62 (0.20)                      | 1.47 (0.05)                    |
|               | IS TNF- $\alpha$ | 2.94 (0.27)                    | 5.51 (0.28)                      | 1.87 (0.10)                    |
| <b>Spleen</b> | Naïve            | 1.51 (0.06)                    | 7.54 (0.51)                      | 5.01 (0.34)                    |
|               | IS TNF- $\alpha$ | 0.865 (0.039)                  | 6.44 (0.34)                      | 7.45 (0.39)                    |
| <b>Brain</b>  | Naïve            | 0.009 (0.001)                  | 0.080 (0.007)                    | 8.45 (0.75)                    |
|               | IS TNF- $\alpha$ | 0.008 (0.001)                  | 0.294 (0.023)                    | 35.1 (2.8)                     |

**Table S8:** Tissue-to-blood ratios and immunospecificity indexes of VCAM/ALB8-SOD conjugates.

| <b>Tissue</b> | <b>Condition</b> | <b>Tissue/Blood Untargeted</b> | <b>Tissue/Blood VCAM/ALB8-SOD</b> | <b>Immunospecificity Index</b> |
|---------------|------------------|--------------------------------|-----------------------------------|--------------------------------|
| <b>Lung</b>   | Naïve            | 0.099 (0.030)                  | 0.140 (0.034)                     | 1.42 (0.35)                    |
|               | IS TNF- $\alpha$ | 0.122 (0.086)                  | 0.269 (0.018)                     | 2.20 (0.15)                    |
| <b>Liver</b>  | Naïve            | 0.205 (0.007)                  | 0.201 (0.012)                     | 0.978 (0.059)                  |
|               | IS TNF- $\alpha$ | 0.229 (0.001)                  | 0.466 (0.035)                     | 2.04 (0.15)                    |
| <b>Heart</b>  | Naïve            | 0.055 (0.007)                  | 0.074 (0.010)                     | 1.33 (0.17)                    |
|               | IS TNF- $\alpha$ | 0.034 (0.003)                  | 0.081 (0.003)                     | 2.41 (0.09)                    |
| <b>Kidney</b> | Naïve            | 0.093 (0.008)                  | 0.286 (0.027)                     | 3.07 (0.29)                    |
|               | IS TNF- $\alpha$ | 0.150 (0.013)                  | 0.366 (0.012)                     | 2.45 (0.08)                    |
| <b>Spleen</b> | Naïve            | 0.131 (0.012)                  | 1.28 (0.07)                       | 9.77 (0.52)                    |
|               | IS TNF- $\alpha$ | 0.175 (0.001)                  | 1.81 (0.11)                       | 10.4 (0.6)                     |
| <b>Brain</b>  | Naïve            | 0.003 (0.001)                  | 0.011 (0.001)                     | 3.29 (0.05)                    |
|               | IS TNF- $\alpha$ | 0.004 (0.001)                  | 0.078 (0.003)                     | 20.9 (0.7)                     |

**Table S9:** Tissue-to blood ratios and immunospecificity indexes of camelid-targeted liposomes.

| <b>Tissue</b> | <b>Condition</b> | <b>Tissue/Blood<br/>Untargeted Lipos</b> | <b>Tissue/Blood<br/>VCAMelid Lipo</b> | <b>Tissue/Blood<br/>VCAM/ALB8 Lipos</b> | <b>ISI<br/>VCAMelid Lipo</b> | <b>ISI<br/>VCAM/ALB8 Lipos</b> |
|---------------|------------------|------------------------------------------|---------------------------------------|-----------------------------------------|------------------------------|--------------------------------|
| <b>Lung</b>   | Naïve            | 0.436 (0.039)                            | 0.207 (0.019)                         | 0.655 (0.107)                           | 0.475 (0.043)                | 1.50 (0.25)                    |
|               | IS TNF- $\alpha$ | 0.595 (0.067)                            | 0.270 (0.082)                         | 0.870 (0.068)                           | 0.453 (0.138)                | 1.46 (0.11)                    |
| <b>Liver</b>  | Naïve            | 0.916 (0.092)                            | 1.12 (0.20)                           | 0.672 (0.136)                           | 1.22 (0.21)                  | 0.734 (0.148)                  |
|               | IS TNF- $\alpha$ | 1.79 (0.17)                              | 1.93 (0.51)                           | 1.37 (0.05)                             | 1.08 (0.28)                  | 0.768 (0.029)                  |
| <b>Heart</b>  | Naïve            | 0.054 (0.005)                            | 0.043 (0.012)                         | 0.050 (0.007)                           | 0.795 (0.230)                | 0.931 (0.129)                  |
|               | IS TNF- $\alpha$ | 0.065 (0.018)                            | 0.076 (0.022)                         | 0.079 (0.010)                           | 1.17 (0.33)                  | 1.22 (0.16)                    |
| <b>Kidney</b> | Naïve            | 0.124 (0.011)                            | 0.118 (0.030)                         | 0.130 (0.017)                           | 0.948 (0.242)                | 1.05 (0.14)                    |
|               | IS TNF- $\alpha$ | 0.135 (0.008)                            | 0.194 (0.056)                         | 0.216 (0.020)                           | 1.44 (0.42)                  | 1.60 (0.15)                    |
| <b>Spleen</b> | Naïve            | 3.40 (0.50)                              | 6.56 (1.03)                           | 5.50 (0.88)                             | 1.93 (0.30)                  | 1.62 (0.26)                    |
|               | IS TNF- $\alpha$ | 3.59 (0.16)                              | 8.97 (2.18)                           | 5.64 (0.49)                             | 2.50 (0.61)                  | 1.57 (0.14)                    |
| <b>Brain</b>  | Naïve            | 0.010 (0.001)                            | 0.008 (0.001)                         | 0.014 (0.001)                           | 0.874 (0.071)                | 1.47 (0.14)                    |
|               | IS TNF- $\alpha$ | 0.024 (0.002)                            | 0.066 (0.016)                         | 0.060 (0.012)                           | 2.75 (0.66)                  | 2.49 (0.50)                    |

**Table S10:** Size and polydispersity index (PDI) of camelid-targeted liposomes

| <b>Liposome</b>  | <b>Size (nm)</b> | <b>PDI</b> |
|------------------|------------------|------------|
| <b>Control</b>   | 151.1            | 0.036      |
| <b>VCAMelid</b>  | 158.1            | 0.104      |
| <b>VCAM/ALB8</b> | 156.2            | 0.087      |
